# Supplementary material for: Mapping restricted introgression across the genomes of admixed indigenous African cattle breeds
Source: PubMed Central journal article supplement (PMC10722721; doi:10.1186/s12711-023-00861-8), 2023-12-14
Supplement: 12711_2023_861_MOESM1_ESM.pdf [file 12711_2023_861_MOESM1_ESM.pdf]

## Additional file 1

### Tables

**Table S1 Sample size of cattle breeds under investigation.** Overview of cattle breeds from Africa, Asia and Europe used in analyses and their corresponding sample size (n)

| Geographical origin | Breed              | n              |                |
|---------------------|--------------------|----------------|----------------|
| Africa              | <b>Ankole</b>      | 7              |                |
|                     | <b>Baoule</b>      | 7              |                |
|                     | <b>Boran</b>       | 47*            |                |
|                     | <b>Djakorre</b>    | 7              |                |
|                     | Gourounsi          | 3              |                |
|                     | <b>Kenana</b>      | 9              |                |
|                     | <b>N'Dama</b>      | 27*            |                |
|                     | <b>Ogaden</b>      | 8              |                |
|                     | <b>Zebu Gobra</b>  | 7              |                |
|                     | Zebu Maure         | 4              |                |
|                     | Asia               | Achai          | 2              |
|                     |                    | Bhagnari       | 2              |
|                     |                    | Cholistani     | 1 <sup>§</sup> |
| Dhanni              |                    | 1 <sup>§</sup> |                |
| Gabraali            |                    | 1 <sup>§</sup> |                |
| Gir                 |                    | 2              |                |
| HisarHiryana        |                    | 1 <sup>§</sup> |                |
| Sahiwal             |                    | 5              |                |
| Tharparkar          |                    | 2              |                |
| Europe              |                    | Angus          | 5              |
|                     | Brown Swiss        | 5              |                |
|                     | Charolais          | 4              |                |
|                     | Eastern Finncattle | 5              |                |
|                     | Hereford           | 5              |                |
|                     | Holstein           | 82*            |                |
|                     | Jersey             | 5              |                |
|                     | Limousine          | 4              |                |
|                     | Scottish Highland  | 2              |                |
|                     | Simmental          | 5              |                |
| Western Finncattle  | 5                  |                |                |

\* Breeds with a considerably higher sample size compared to the others were reduced to ten samples

<sup>§</sup> Samples described in Iqbal et al. [92] were considered as 'Pakistan population' (n = 4)

African breeds highlighted in bold had at least 7 samples and were considered for  $F_{ST}$  calculation

**Table S2 Breeds and sample sizes in ancestral and test populations.** Samples were grouped into ancestry and test populations based on Admixture ancestry estimations with  $K = 3$  for two genomic cline approaches: (1) European *Bos taurus* and Asian *Bos indicus* samples as ancestral populations S1 and S0, respectively, and all African samples as test samples (“European taurine S1”) and (2) African *Bos taurus* and Asian *Bos indicus* samples as ancestral populations S1 and S0, respectively, and remaining African samples as test samples (“African taurine S1”).

|                                                                    | “European taurine S1” |                | “African taurine S1” |                |
|--------------------------------------------------------------------|-----------------------|----------------|----------------------|----------------|
|                                                                    | Breed                 | n              | Breed                | N              |
| Asian <i>Bos indicus</i><br>n = 16<br>(S0)                         | Achai                 | 2              | Achai                | 2              |
|                                                                    | Bhagnhari             | 2              | Bhagnhari            | 2              |
|                                                                    | Cholistani            | 1              | Cholistani           | 1              |
|                                                                    | Dhanni                | 1              | Dhanni               | 1              |
|                                                                    | Gabraali              | 1              | Gabraali             | 1              |
|                                                                    | Gir                   | 2              | Gir                  | 2              |
|                                                                    | HisarHiryana          | 1              | HisarHiryana         | 1              |
|                                                                    | Sahiwal               | 4 <sup>a</sup> | Sahiwal              | 4 <sup>a</sup> |
|                                                                    | Tharparkar            | 2              | Tharparkar           | 2              |
| European <i>Bos taurus</i><br>n = 54<br>(S1)                       | Angus                 | 5              | NA                   |                |
|                                                                    | Brown Swiss           | 5              |                      |                |
|                                                                    | Charolais             | 3 <sup>b</sup> |                      |                |
|                                                                    | Eastern Finncattle    | 5              |                      |                |
|                                                                    | Hereford              | 5              |                      |                |
|                                                                    | Holstein              | 10             |                      |                |
|                                                                    | Jersey                | 5              |                      |                |
|                                                                    | Limousine             | 4              |                      |                |
|                                                                    | Scottish Highland     | 2              |                      |                |
| Simmental                                                          | 5                     |                |                      |                |
| Western Finncattle                                                 | 5                     |                |                      |                |
| African <i>Bos taurus</i><br>n = 14<br>(S1)                        | NA                    |                | Baoule               | 6              |
|                                                                    |                       |                | Gourounsi            | 1              |
|                                                                    |                       |                | N'dama               | 7              |
| African test samples<br>n = 71 (approach 1)<br>n = 57 (approach 2) | Ankole                | 7              | Ankole               | 7              |
|                                                                    | Baoule                | 7              | Baoule*              | 1              |
|                                                                    | Boran                 | 10             | Boran                | 10             |
|                                                                    | Djakorre              | 7              | Djakorre             | 7              |
|                                                                    | Gourounsi             | 3              | Gourounsi*           | 2              |
|                                                                    | Kenana                | 9              | Kenana               | 9              |
|                                                                    | N'dama                | 10             | N'dama*              | 3              |
|                                                                    | Ogaden                | 8              | Ogaden               | 8              |
|                                                                    | Zebu Gobra            | 7              | Zebu Gobra           | 7              |
|                                                                    | Zebu Maure            | 3 <sup>c</sup> | Zebu Maure           | 3 <sup>c</sup> |

<sup>a</sup> One Sahiwal sample removed from subsequent analyses due to  $< 0.99$  proportion of indicine ancestry

<sup>b</sup> One Charolais sample removed from subsequent analyses due to  $< 0.99$  proportion of European taurine ancestry

<sup>c</sup> One Zebu Maure sample from Table 1 was removed due to high taurine ancestry (~80% proportions of taurine ancestry whereas “zebu” are expected to have high indicine ancestry)

\* Breeds with samples included in both S1 and test populations
