# Supplementary material for: Mapping restricted introgression across the genomes of admixed indigenous African cattle breeds
Source: PubMed Central journal article supplement (PMC10722721; doi:10.1186/s12711-023-00861-8), 2023-12-14
Supplement: 12711_2023_861_MOESM4_ESM.pdf [file 12711_2023_861_MOESM4_ESM.pdf]

## Additional file 4

### Tables

**Table S4 Association between variant effect and cline steepness (v).** Variant effects predicted by VEP (McLaren et al. [61]) were tested for their effect on v using a linear regression ( $y \sim x$ ) where  $y = \ln(v)$  and  $x = \text{effect category}$ . The table shows number of variants (n) and the effect estimate for  $\ln(v)$ . Higher estimated  $\ln(v)$  indicates stronger evidence for restricted introgression.

|                                     | <i>European taurine SI</i> |                                  | <i>African taurine SI</i> |                                  |
|-------------------------------------|----------------------------|----------------------------------|---------------------------|----------------------------------|
| Effect category                     | n                          | Estimated $\ln(v) \pm \text{SE}$ | n                         | Estimated $\ln(v) \pm \text{SE}$ |
| 3_prime_UTR_variant                 | 21,234                     | 0.17 $\pm$ 0.009                 | 15,232                    | -0.59 $\pm$ 0.013                |
| 5_prime_UTR_variant                 | 3,207                      | 0.19 $\pm$ 0.023                 | 2,329                     | -0.54 $\pm$ 0.032                |
| downstream_gene_variant             | 10,059                     | 0.20 $\pm$ 0.013                 | 7,281                     | -0.62 $\pm$ 0.018                |
| intergenic_variant                  | 4,873,627                  | 0.19 $\pm$ 0.001                 | 3,492,131                 | -0.64 $\pm$ 0.001                |
| intron_variant                      | 2,634,414                  | 0.21 $\pm$ 0.001                 | 1,912,359                 | -0.60 $\pm$ 0.001                |
| missense_variant                    | 10,968                     | 0.25 $\pm$ 0.013                 | 7,825                     | -0.58 $\pm$ 0.017                |
| non_coding_transcript_exon_variant  | 4,735                      | 0.22 $\pm$ 0.019                 | 3,535                     | -0.53 $\pm$ 0.026                |
| splice_polypyrimidine_tract_variant | 3,575                      | 0.19 $\pm$ 0.022                 | 2,594                     | -0.59 $\pm$ 0.030                |
| splice_region_variant               | 1,899                      | 0.18 $\pm$ 0.030                 | 1,356                     | -0.55 $\pm$ 0.042                |
| synonymous_variant                  | 14,161                     | 0.22 $\pm$ 0.011                 | 10,501                    | -0.58 $\pm$ 0.015                |
| upstream_gene_variant               | 5,500                      | 0.20 $\pm$ 0.018                 | 3,943                     | -0.60 $\pm$ 0.025                |
