# Supplementary material for: Mapping restricted introgression across the genomes of admixed indigenous African cattle breeds
Source: PubMed Central journal article supplement (PMC10722721; doi:10.1186/s12711-023-00861-8), 2023-12-14
Supplement: 12711_2023_861_MOESM6_ESM.pdf [file 12711_2023_861_MOESM6_ESM.pdf]

## Additional file 6

### Tables

**Table S6** Linear regression results and multiple comparisons of means for tests of association between recombination category (hotspot, coldspot, background) and  $F_{ST}$  and cline steepness (European S1 and African S1 approaches).

|                   | hotspot fitted mean (se) | coldspot fitted mean (se) | background fitted mean (se) | Linear regression |    |          |           | Tukey contrasts      |         |                       |         |                      |         |
|-------------------|--------------------------|---------------------------|-----------------------------|-------------------|----|----------|-----------|----------------------|---------|-----------------------|---------|----------------------|---------|
|                   |                          |                           |                             | F-statistic       | df | df       | p-value   | hotspot -coldspot    |         | background - coldspot |         | background - hotspot |         |
|                   |                          |                           |                             |                   |    |          |           | estimate (se)        | p-value | estimate (se)         | p-value | estimate (se)        | p-value |
| $F_{ST}$          | 0.093<br>(3.6e-4)        | 0.102<br>(1.4e-4)         | 0.099<br>(2.8e-5)           | 420.7             | 2  | 12729577 | < 2.2e-16 | -0.0095<br>(0.00038) | <2e-16  | -0.0032<br>(0.00014)  | <2e-16  | 0.0062<br>(0.00036)  | <2e-16  |
| $\ln(v)$<br>(Eur) | 0.081<br>(0.006)         | 0.238<br>(0.002)          | 0.197<br>(0.0005)           | 328.8             | 2  | 8245159  | < 2.2e-16 | -0.157<br>(0.0065)   | <2e-16  | -0.041<br>(0.0024)    | <2e-16  | 0.117<br>(0.0061)    | <2e-16  |
| $\ln(v)$<br>(Afr) | -0.873<br>(0.008)        | -0.476<br>(0.003)         | -0.628<br>(0.0007)          | 1239              | 2  | 5899457  | < 2.2e-16 | -0.397<br>(0.0091)   | <2e-16  | -0.152<br>(0.0033)    | <2e-16  | 0.244<br>(0.0085)    | <2e-16  |
