# Supplementary material for: Mapping restricted introgression across the genomes of admixed indigenous African cattle breeds
Source: PubMed Central journal article supplement (PMC10722721; doi:10.1186/s12711-023-00861-8), 2023-12-14
Supplement: 12711_2023_861_MOESM7_ESM.pdf [file 12711_2023_861_MOESM7_ESM.pdf]

## Additional file 7

### Tables

**Table S7** SRA, ENA and CNGB Nucleotide Sequence Archive project accession codes for cattle samples used in this study

| <b>Breed</b>       | <b>Database</b>                                                                                                               | <b>Project ID</b> |
|--------------------|-------------------------------------------------------------------------------------------------------------------------------|-------------------|
| Achai              | CNGB Nucleotide Sequence Archive                                                                                              | CNP0000189        |
| Angus              | SRA                                                                                                                           | PRJNA343262       |
| Ankole             | SRA                                                                                                                           | PRJNA312138       |
| Ankole             | ENA                                                                                                                           | PRJEB39282        |
| Baoule             | ENA                                                                                                                           | PRJEB39924        |
| Bhagnari           | CNGB Nucleotide Sequence Archive                                                                                              | CNP0000189        |
| Boran              | ENA                                                                                                                           | PRJEB39210        |
| Boran              | SRA                                                                                                                           | PRJNA312138       |
| Brown Swiss        | SRA                                                                                                                           | PRJEB18113        |
| Charolais          | SRA                                                                                                                           | PRJNA176557       |
| Cholistani         | CNGB Nucleotide Sequence Archive                                                                                              | CNP0000189        |
| Dhanni             | CNGB Nucleotide Sequence Archive                                                                                              | CNP0000189        |
| Djakkore           | ENA                                                                                                                           | PRJEB39924        |
| Eastern Finncattle | ENA                                                                                                                           | PRJEB28185        |
| Gabraali           | CNGB Nucleotide Sequence Archive                                                                                              | CNP0000189        |
| Gir                | SRA                                                                                                                           | PRJNA343262       |
| Gourounsi          | ENA                                                                                                                           | PRJEB39924        |
| Hereford           | SRA                                                                                                                           | PRJNA176557       |
| HisarHiryana       | CNGB Nucleotide Sequence Archive                                                                                              | CNP0000189        |
| Holstein           | ENA                                                                                                                           | PRJEB14552        |
| Jersey             | ENA                                                                                                                           | PRJNA431934       |
| Kenana             | SRA                                                                                                                           | PRJNA312138       |
| Limousine          | ENA                                                                                                                           | PRJNA343262       |
| Limousine          | SRA                                                                                                                           | PRJEB18113        |
| Limousine          | ENA                                                                                                                           | PRJNA176557       |
| NDama              | SRA                                                                                                                           | PRJNA312138       |
| NDama              | <a href="https://zenodo.org/badge/DOI/10.5281/zenodo.6855979.svg">https://zenodo.org/badge/DOI/10.5281/zenodo.6855979.svg</a> |                   |
| NDama              | ENA                                                                                                                           | PRJEB36894        |
| NDama              | ENA                                                                                                                           | PRJEB39353        |
| NDama              | ENA                                                                                                                           | PRJEB39924        |
| Ogaden             | SRA                                                                                                                           | PRJNA312138       |
| Sahiwal            | ENA                                                                                                                           | PRJEB39352        |
| Sahiwal            | ENA                                                                                                                           | PRJNA379859       |
| Sahiwal            | CNGB Nucleotide Sequence Archive                                                                                              | CNP0000189        |
| Scottish Highland  | SRA                                                                                                                           | PRJEB18113        |
| Simmental          | ENA                                                                                                                           | PRJNA343262       |
| Tharparkar         | CNGB Nucleotide Sequence Archive                                                                                              | CNP0000189        |

|                    |     |             |
|--------------------|-----|-------------|
| Tharparkar         | ENA | PRJNA379859 |
| Western Finncattle | ENA | PRJEB28185  |
| ZebuGobra          | ENA | PRJEB39924  |
| ZebuMaure          | ENA | PRJEB39924  |
